# Supplementary material for: The Costs of Occupational Mobility: An Aggregate Analysis
Source: Oxford University Press journal article supplement (doi:10.1093/jeea/jvx006), 2017-03-24
Supplement: jvx006_supplement_files.zip [file jvx006_supplement_files.zip]

Archive with 2 entries (2 files):
- do files for JEEA v2.zip
- jvx006_Supp.pdf
